# Supplementary material for: Modulation of soluble receptor for advanced glycation end-products (RAGE) isoforms and their ligands in healthy aging
Source: Aging (Albany NY). 2019 Mar 23;11(6):1648–63. doi: 10.18632/aging.101860 (PMC6461165; doi:10.18632/aging.101860)
Supplement: Supplementary Table 1 [file aging-11-101860-s001.xlsx]

## Sheet: Pearson Correlation
Pearson Correlation Coefficients (r)
Prob > |r| under H0: Rho=0 (P)
Number of observations (n)
		Age (yrs)	Sex (n/% male)	BMI (Kg/m2)	WC (cm)	H (cm)	W/H	WBC (103/uL)	RBC (106/uL)	log Triglycerides (mg/dL)	Cholesterol (mg/dL)	HDL (mg/dL)	LDL (mg/dL)	ApoAI (mg/dL)	ApoB (mg/dL)	log Insulin (uiU/mL)	Glucose (mg/dL)	log HOMA Index	HGB (g/dL)	HbA1c (%)	GGT (U/L)	log AST (U/L)	log ALT (U/L)	Transferrin (mg/dL)	log Ferritin (ng/mL)	log Azotemia (mg/dL)	Creatinine (mg/dL)	log PAI-1 (ng/mL)	log CRP (mg/L)	log IL6 (pg/mL)	log HMGB1 (ng/mL)	log S100A8/A9 (ng/mL)	log AGEs (μg/mL)
Age (yrs)	r	1	-0.03609	0.12833	0.3019	0.1354	0.28569	-0.1221	-0.16104	0.27939	0.15607	-0.05018	0.18367	0.02139	0.09778	0.03076	0.17548	0.06305	-0.13831	0.24483	0.16916	0.26267	-0.00605	-0.26241	0.24254	0.37303	0.16088	0.12622	0.27776	0.466	0.08673	0.20693	0.15994
	P		0.6413	0.0974	<0.0001	0.0801	0.0002	0.1138	0.0365	0.0002	0.0427	0.517	0.0172	0.7832	0.2073	0.6913	0.0225	0.4154	0.0729	0.0013	0.0284	0.0006	0.938	0.0006	0.0015	<0.0001	0.0367	0.102	0.0003	<0.0001	0.2695	0.0091	0.0384
	n	169	169	168	169	168	168	169	169	168	169	169	168	168	168	169	169	169	169	169	168	167	168	168	168	169	169	169	166	162	164	158	168
Sex (n/% male)	r	-0.03609	1	-0.04371	0.24343	-0.16111	0.48427	0.14194	0.39196	0.1613	-0.20702	-0.35736	-0.11934	-0.22955	0.00552	-0.09612	0.0897	-0.07359	0.53604	-0.02613	0.14777	0.16024	0.26953	-0.10735	0.38754	0.12183	0.51068	-0.02212	-0.08029	-0.08804	0.17061	0.12328	0.08811
	P	0.6413		0.5737	0.0014	0.037	<0.0001	0.0656	<0.0001	0.0367	0.0069	<0.0001	0.1234	0.0028	0.9434	0.2138	0.2461	0.3417	<0.0001	0.7359	0.0559	0.0386	0.0004	0.1661	<0.0001	0.1146	<0.0001	0.7753	0.3038	0.2653	0.0289	0.1228	0.2561
	n	169	169	168	169	168	168	169	169	168	169	169	168	168	168	169	169	169	169	169	168	167	168	168	168	169	169	169	166	162	164	158	168
BMI (Kg/m2)	r	0.12833	-0.04371	1	0.77162	0.75642	0.33991	0.1256	0.12395	0.26482	0.11672	-0.14661	0.11679	-0.1308	0.07598	0.36157	0.29238	0.40216	0.11064	0.29093	0.15296	0.04696	0.14065	-0.04117	0.13209	0.12417	0.04343	0.06448	0.38903	0.30661	0.05479	0.13241	0.14534
	P	0.0974	0.5737		<0.0001	<0.0001	<0.0001	0.1047	0.1094	0.0005	0.1319	0.0579	0.1328	0.092	0.3291	<0.0001	0.0001	<0.0001	0.1534	0.0001	0.0484	0.548	0.0698	0.5973	0.0888	0.1088	0.5761	0.4063	<0.0001	<0.0001	0.4872	0.0983	0.0609
	n	168	168	168	168	167	167	168	168	167	168	168	167	167	167	168	168	168	168	168	167	166	167	167	167	168	168	168	165	161	163	157	167
WC (cm)	r	0.3019	0.24343	0.77162	1	0.69181	0.71332	0.03029	0.23747	0.38719	0.06102	-0.30615	0.14042	-0.18621	0.12126	0.35531	0.39507	0.41499	0.22922	0.3382	0.2379	0.11323	0.13305	-0.07499	0.30878	0.13593	0.18194	0.15426	0.42485	0.32207	0.11953	0.18666	0.17678
	P	<0.0001	0.0014	<0.0001		<0.0001	<0.0001	0.6958	0.0019	<0.0001	0.4306	<0.0001	0.0695	0.0157	0.1174	<0.0001	<0.0001	<0.0001	0.0027	<0.0001	0.0019	0.1451	0.0856	0.334	<0.0001	0.078	0.0179	0.0452	<0.0001	<0.0001	0.1274	0.0189	0.0219
	n	169	169	168	169	168	168	169	169	168	169	169	168	168	168	169	169	169	169	169	168	167	168	168	168	169	169	169	166	162	164	158	168
H (cm)	r	0.1354	-0.16111	0.75642	0.69181	1	-0.00957	-0.03038	0.06448	0.12308	0.12656	0.04106	0.09549	-0.03347	0.02586	0.27269	0.26721	0.31157	-0.01234	0.21864	0.03238	-0.0313	-0.03815	0.00743	0.04434	0.0092	-0.05241	0.04627	0.28939	0.21647	-0.06968	0.03517	0.03369
	P	0.0801	0.037	<0.0001	<0.0001		0.902	0.6959	0.4063	0.1131	0.1021	0.5972	0.2196	0.6677	0.7401	0.0003	0.0005	<0.0001	0.8738	0.0044	0.6779	0.6889	0.6245	0.924	0.5694	0.9057	0.4999	0.5514	0.0002	0.0058	0.3768	0.6619	0.6656
	n	168	168	167	168	168	168	168	168	167	168	168	167	167	167	168	168	168	168	168	167	166	167	167	167	168	168	168	165	161	163	157	167
W/H	r	0.28569	0.48427	0.33991	0.71332	-0.00957	1	0.08806	0.26603	0.41501	-0.03623	-0.4644	0.10409	-0.22694	0.1355	0.22529	0.28662	0.26957	0.32286	0.25047	0.29652	0.19066	0.22327	-0.09821	0.37092	0.17207	0.30529	0.18138	0.31796	0.24098	0.23324	0.23475	0.22283
	P	0.0002	<0.0001	<0.0001	<0.0001	0.902		0.2564	0.0005	<0.0001	0.6411	<0.0001	0.1807	0.0032	0.0808	0.0033	0.0002	0.0004	<0.0001	0.0011	<0.0001	0.0139	0.0037	0.2067	<0.0001	0.0257	<0.0001	0.0186	<0.0001	0.0021	0.0027	0.0031	0.0038
	n	168	168	167	168	168	168	168	168	167	168	168	167	167	167	168	168	168	168	168	167	166	167	167	167	168	168	168	165	161	163	157	167
WBC (103/uL)	r	-0.1221	0.14194	0.1256	0.03029	-0.03038	0.08806	1	0.09387	0.12059	-0.01008	-0.19573	0.00648	-0.18006	0.03033	0.09218	-0.09758	0.07069	0.08386	0.00132	0.21595	-0.02329	0.12773	-0.01546	0.09575	-0.10657	0.00586	0.06553	0.12296	0.27196	0.34442	0.44188	0.06229
	P	0.1138	0.0656	0.1047	0.6958	0.6959	0.2564		0.2248	0.1195	0.8965	0.0108	0.9336	0.0195	0.6964	0.2333	0.2069	0.3611	0.2783	0.9864	0.0049	0.7652	0.0989	0.8423	0.217	0.1679	0.9397	0.3973	0.1145	0.0005	<0.0001	<0.0001	0.4225
	n	169	169	168	169	168	168	169	169	168	169	169	168	168	168	169	169	169	169	169	168	167	168	168	168	169	169	169	166	162	164	158	168
RBC (106/uL)	r	-0.16104	0.39196	0.12395	0.23747	0.06448	0.26603	0.09387	1	0.2356	-0.02334	-0.23335	0.06396	-0.11872	0.10651	0.16339	0.02092	0.16171	0.67136	0.09326	0.15694	0.14751	0.24596	0.14324	0.13066	-0.11398	0.26975	-0.01745	0.09443	-0.12208	0.12664	0.05597	0.03091
	P	0.0365	<0.0001	0.1094	0.0019	0.4063	0.0005	0.2248		0.0021	0.7633	0.0023	0.4101	0.1254	0.1694	0.0338	0.7872	0.0357	<0.0001	0.2278	0.0422	0.0571	0.0013	0.064	0.0914	0.1401	0.0004	0.8218	0.2262	0.1217	0.1061	0.4849	0.6908
	n	169	169	168	169	168	168	169	169	168	169	169	168	168	168	169	169	169	169	169	168	167	168	168	168	169	169	169	166	162	164	158	168
log Triglycerides (mg/dL)	r	0.27939	0.1613	0.26482	0.38719	0.12308	0.41501	0.12059	0.2356	1	0.22908	-0.49033	0.136	-0.12705	0.37498	0.22292	0.23517	0.25864	0.18758	0.28974	0.41824	0.18855	0.1932	0.06969	0.09523	0.03771	0.2063	0.11402	0.34233	0.41032	0.13004	0.18867	0.00641
	P	0.0002	0.0367	0.0005	<0.0001	0.1131	<0.0001	0.1195	0.0021		0.0028	<0.0001	0.0797	0.1018	<0.0001	0.0037	0.0022	0.0007	0.0149	0.0001	<0.0001	0.0147	0.0121	0.3709	0.2209	0.6274	0.0073	0.1411	<0.0001	<0.0001	0.098	0.018	0.9344
	n	168	168	167	168	167	167	168	168	168	168	168	167	167	167	168	168	168	168	168	167	167	168	167	167	168	168	168	165	161	163	157	167
Cholesterol (mg/dL)	r	0.15607	-0.20702	0.11672	0.06102	0.12656	-0.03623	-0.01008	-0.02334	0.22908	1	0.30478	0.82123	0.25842	0.69527	-0.12572	0.11823	-0.09971	0.11821	0.11134	0.26513	0.07047	-0.01647	0.02738	0.03616	0.04846	-0.02898	-0.10828	0.01785	0.08642	-0.24135	-0.10585	0.00271
	P	0.0427	0.0069	0.1319	0.4306	0.1021	0.6411	0.8965	0.7633	0.0028		<0.0001	<0.0001	0.0007	<0.0001	0.1034	0.1258	0.1971	0.1258	0.1496	0.0005	0.3655	0.8322	0.7246	0.6417	0.5315	0.7084	0.1611	0.8194	0.2742	0.0019	0.1856	0.9722
	n	169	169	168	169	168	168	169	169	168	169	169	168	168	168	169	169	169	169	169	168	167	168	168	168	169	169	169	166	162	164	158	168
HDL (mg/dL)	r	-0.05018	-0.35736	-0.14661	-0.30615	0.04106	-0.4644	-0.19573	-0.23335	-0.49033	0.30478	1	0.08281	0.6554	-0.13494	-0.31726	-0.20375	-0.34402	-0.11407	-0.07766	-0.27527	-0.12618	-0.33191	0.01492	-0.09227	0.0307	-0.19854	-0.27502	-0.19259	-0.20823	-0.33148	-0.30452	-0.02802
	P	0.517	<0.0001	0.0579	<0.0001	0.5972	<0.0001	0.0108	0.0023	<0.0001	<0.0001		0.2859	<0.0001	0.0812	<0.0001	0.0079	<0.0001	0.1397	0.3156	0.0003	0.1042	<0.0001	0.8477	0.2342	0.6919	0.0097	0.0003	0.0129	0.0078	<0.0001	0.0001	0.7184
	n	169	169	168	169	168	168	169	169	168	169	169	168	168	168	169	169	169	169	169	168	167	168	168	168	169	169	169	166	162	164	158	168
LDL (mg/dL)	r	0.18367	-0.11934	0.11679	0.14042	0.09549	0.10409	0.00648	0.06396	0.136	0.82123	0.08281	1	0.0973	0.7505	0.0434	0.10746	0.06068	0.11818	0.03795	0.32438	0.11807	0.08769	0.07386	0.04498	-0.01831	0.01204	0.06	0.02885	0.0285	-0.17011	-0.01686	-0.00742
	P	0.0172	0.1234	0.1328	0.0695	0.2196	0.1807	0.9336	0.4101	0.0797	<0.0001	0.2859		0.2096	<0.0001	0.5765	0.1656	0.4346	0.1271	0.6253	<0.0001	0.1298	0.2598	0.3414	0.5626	0.8138	0.8769	0.4398	0.7122	0.7197	0.0299	0.834	0.9242
	n	168	168	167	168	167	167	168	168	167	168	168	168	168	168	168	168	168	168	168	168	166	167	168	168	168	168	168	166	161	163	157	167
ApoAI (mg/dL)	r	0.02139	-0.22955	-0.1308	-0.18621	-0.03347	-0.22694	-0.18006	-0.11872	-0.12705	0.25842	0.6554	0.0973	1	0.15189	-0.11667	-0.10292	-0.13095	-0.01756	-0.07992	-0.17509	0.00142	-0.15446	0.09793	0.03031	0.1232	-0.10156	-0.12482	-0.18551	-0.17886	-0.13491	-0.22191	0.02524
	P	0.7832	0.0028	0.092	0.0157	0.6677	0.0032	0.0195	0.1254	0.1018	0.0007	<0.0001	0.2096		0.0494	0.132	0.1843	0.0907	0.8212	0.3031	0.0232	0.9855	0.0463	0.2066	0.6965	0.1116	0.1902	0.1069	0.0167	0.0232	0.086	0.0052	0.7461
	n	168	168	167	168	167	167	168	168	167	168	168	168	168	168	168	168	168	168	168	168	166	167	168	168	168	168	168	166	161	163	157	167
ApoB (mg/dL)	r	0.09778	0.00552	0.07598	0.12126	0.02586	0.1355	0.03033	0.10651	0.37498	0.69527	-0.13494	0.7505	0.15189	1	0.06913	0.22844	0.1086	0.18767	0.10332	0.32053	0.06073	0.11497	0.15978	0.10938	-0.00292	0.05187	0.0352	0.04846	0.11158	-0.07988	0.02603	-0.04364
	P	0.2073	0.9434	0.3291	0.1174	0.7401	0.0808	0.6964	0.1694	<0.0001	<0.0001	0.0812	<0.0001	0.0494		0.3733	0.0029	0.1611	0.0149	0.1826	<0.0001	0.437	0.139	0.0386	0.1581	0.97	0.5043	0.6506	0.5353	0.1588	0.3108	0.7462	0.5755
	n	168	168	167	168	167	167	168	168	167	168	168	168	168	168	168	168	168	168	168	168	166	167	168	168	168	168	168	166	161	163	157	167
log Insulin (uiU/mL)	r	0.03076	-0.09612	0.36157	0.35531	0.27269	0.22529	0.09218	0.16339	0.22292	-0.12572	-0.31726	0.0434	-0.11667	0.06913	1	0.10555	0.98305	-0.05577	0.07464	0.23421	0.13722	0.13608	0.22126	-0.02935	0.05661	0.01789	0.2301	0.29437	0.13407	0.14207	0.10555	0.04259
	P	0.6913	0.2138	<0.0001	<0.0001	0.0003	0.0033	0.2333	0.0338	0.0037	0.1034	<0.0001	0.5765	0.132	0.3733		0.172	<0.0001	0.4714	0.3348	0.0022	0.077	0.0786	0.0039	0.7057	0.4647	0.8175	0.0026	0.0001	0.089	0.0696	0.1869	0.5836
	n	169	169	168	169	168	168	169	169	168	169	169	168	168	168	169	169	169	169	169	168	167	168	168	168	169	169	169	166	162	164	158	168
Glucose (mg/dL)	r	0.17548	0.0897	0.29238	0.39507	0.26721	0.28662	-0.09758	0.02092	0.23517	0.11823	-0.20375	0.10746	-0.10292	0.22844	0.10555	1	0.28556	0.0893	0.51658	0.12457	0.08834	0.17938	-0.00871	0.21596	0.16776	0.23443	0.11472	0.21763	0.27697	0.04942	0.02475	0.16835
	P	0.0225	0.2461	0.0001	<0.0001	0.0005	0.0002	0.2069	0.7872	0.0022	0.1258	0.0079	0.1656	0.1843	0.0029	0.172		0.0002	0.2482	<0.0001	0.1077	0.2563	0.02	0.9108	0.0049	0.0292	0.0022	0.1375	0.0049	0.0004	0.5297	0.7575	0.0292
	n	169	169	168	169	168	168	169	169	168	169	169	168	168	168	169	169	169	169	169	168	167	168	168	168	169	169	169	166	162	164	158	168
log HOMA Index	r	0.06305	-0.07359	0.40216	0.41499	0.31157	0.26957	0.07069	0.16171	0.25864	-0.09971	-0.34402	0.06068	-0.13095	0.1086	0.98305	0.28556	1	-0.0368	0.16676	0.24628	0.14764	0.16352	0.21026	0.01189	0.08691	0.06109	0.24339	0.32264	0.1804	0.14654	0.10689	0.06953
	P	0.4154	0.3417	<0.0001	<0.0001	<0.0001	0.0004	0.3611	0.0357	0.0007	0.1971	<0.0001	0.4346	0.0907	0.1611	<0.0001	0.0002		0.6348	0.0302	0.0013	0.0569	0.0342	0.0062	0.8784	0.2612	0.4301	0.0014	<0.0001	0.0216	0.0611	0.1813	0.3705
	n	169	169	168	169	168	168	169	169	168	169	169	168	168	168	169	169	169	169	169	168	167	168	168	168	169	169	169	166	162	164	158	168
HGB (g/dL)	r	-0.13831	0.53604	0.11064	0.22922	-0.01234	0.32286	0.08386	0.67136	0.18758	0.11821	-0.11407	0.11818	-0.01756	0.18767	-0.05577	0.0893	-0.0368	1	0.00359	0.13395	0.09792	0.19218	-0.00865	0.31195	-0.02204	0.28717	-0.14973	-0.01521	-0.14578	0.12284	0.06727	0.07229
	P	0.0729	<0.0001	0.1534	0.0027	0.8738	<0.0001	0.2783	<0.0001	0.0149	0.1258	0.1397	0.1271	0.8212	0.0149	0.4714	0.2482	0.6348		0.9631	0.0835	0.2081	0.0126	0.9114	<0.0001	0.776	0.0002	0.052	0.8458	0.0642	0.1171	0.401	0.3518
	n	169	169	168	169	168	168	169	169	168	169	169	168	168	168	169	169	169	169	169	168	167	168	168	168	169	169	169	166	162	164	158	168
HbA1c (%)	r	0.24483	-0.02613	0.29093	0.3382	0.21864	0.25047	0.00132	0.09326	0.28974	0.11134	-0.07766	0.03795	-0.07992	0.10332	0.07464	0.51658	0.16676	0.00359	1	0.14479	0.14338	0.12601	0.04311	0.11474	0.10403	0.07824	0.06868	0.27658	0.32011	-0.05567	0.05209	0.08249
	P	0.0013	0.7359	0.0001	<0.0001	0.0044	0.0011	0.9864	0.2278	0.0001	0.1496	0.3156	0.6253	0.3031	0.1826	0.3348	<0.0001	0.0302	0.9631		0.0611	0.0645	0.1036	0.579	0.1386	0.1783	0.3119	0.3749	0.0003	<0.0001	0.4789	0.5157	0.2878
	n	169	169	168	169	168	168	169	169	168	169	169	168	168	168	169	169	169	169	169	168	167	168	168	168	169	169	169	166	162	164	158	168
GGT (U/L)	r	0.16916	0.14777	0.15296	0.2379	0.03238	0.29652	0.21595	0.15694	0.41824	0.26513	-0.27527	0.32438	-0.17509	0.32053	0.23421	0.12457	0.24628	0.13395	0.14479	1	0.27957	0.31649	0.0709	0.2322	-0.04439	0.08141	0.20112	0.28191	0.249	0.13821	0.17699	0.0689
	P	0.0284	0.0559	0.0484	0.0019	0.6779	<0.0001	0.0049	0.0422	<0.0001	0.0005	0.0003	<0.0001	0.0232	<0.0001	0.0022	0.1077	0.0013	0.0835	0.0611		0.0003	<0.0001	0.3611	0.0025	0.5678	0.2942	0.0089	0.0002	0.0014	0.0785	0.0266	0.3763
	n	168	168	167	168	167	167	168	168	167	168	168	168	168	168	168	168	168	168	168	168	166	167	168	168	168	168	168	166	161	163	157	167
log AST (U/L)	r	0.26267	0.16024	0.04696	0.11323	-0.0313	0.19066	-0.02329	0.14751	0.18855	0.07047	-0.12618	0.11807	0.00142	0.06073	0.13722	0.08834	0.14764	0.09792	0.14338	0.27957	1	0.62754	0.09583	0.13637	0.07682	0.13832	0.0665	0.08671	0.14264	0.0257	0.07521	0.15401
	P	0.0006	0.0386	0.548	0.1451	0.6889	0.0139	0.7652	0.0571	0.0147	0.3655	0.1042	0.1298	0.9855	0.437	0.077	0.2563	0.0569	0.2081	0.0645	0.0003		<0.0001	0.2194	0.0798	0.3238	0.0746	0.3932	0.2696	0.072	0.7454	0.3508	0.0476
	n	167	167	166	167	166	166	167	167	167	167	167	166	166	166	167	167	167	167	167	166	167	167	166	166	167	167	167	164	160	162	156	166
log ALT (U/L)	r	-0.00605	0.26953	0.14065	0.13305	-0.03815	0.22327	0.12773	0.24596	0.1932	-0.01647	-0.33191	0.08769	-0.15446	0.11497	0.13608	0.17938	0.16352	0.19218	0.12601	0.31649	0.62754	1	-0.00161	0.28498	0.07717	0.1353	0.13402	0.11387	0.09708	0.1955	0.22088	0.11644
	P	0.938	0.0004	0.0698	0.0856	0.6245	0.0037	0.0989	0.0013	0.0121	0.8322	<0.0001	0.2598	0.0463	0.139	0.0786	0.02	0.0342	0.0126	0.1036	<0.0001	<0.0001		0.9835	0.0002	0.3201	0.0803	0.0833	0.1453	0.2205	0.0124	0.0054	0.134
	n	168	168	167	168	167	167	168	168	168	168	168	167	167	167	168	168	168	168	168	167	167	168	167	167	168	168	168	165	161	163	157	167
Transferrin (mg/dL)	r	-0.26241	-0.10735	-0.04117	-0.07499	0.00743	-0.09821	-0.01546	0.14324	0.06969	0.02738	0.01492	0.07386	0.09793	0.15978	0.22126	-0.00871	0.21026	-0.00865	0.04311	0.0709	0.09583	-0.00161	1	-0.45083	-0.26243	-0.14153	0.08455	-0.03168	-0.1029	-0.16223	-0.10899	-0.08544
	P	0.0006	0.1661	0.5973	0.334	0.924	0.2067	0.8423	0.064	0.3709	0.7246	0.8477	0.3414	0.2066	0.0386	0.0039	0.9108	0.0062	0.9114	0.579	0.3611	0.2194	0.9835		<0.0001	0.0006	0.0673	0.2759	0.6854	0.194	0.0385	0.1742	0.2723
	n	168	168	167	168	167	167	168	168	167	168	168	168	168	168	168	168	168	168	168	168	166	167	168	168	168	168	168	166	161	163	157	167
log Ferritin (ng/mL)	r	0.24254	0.38754	0.13209	0.30878	0.04434	0.37092	0.09575	0.13066	0.09523	0.03616	-0.09227	0.04498	0.03031	0.10938	-0.02935	0.21596	0.01189	0.31195	0.11474	0.2322	0.13637	0.28498	-0.45083	1	0.23193	0.20965	-0.0079	0.14064	0.08897	0.12567	0.13192	0.17999
	P	0.0015	<0.0001	0.0888	<0.0001	0.5694	<0.0001	0.217	0.0914	0.2209	0.6417	0.2342	0.5626	0.6965	0.1581	0.7057	0.0049	0.8784	<0.0001	0.1386	0.0025	0.0798	0.0002	<0.0001		0.0025	0.0064	0.9191	0.0707	0.2617	0.1099	0.0996	0.0199
	n	168	168	167	168	167	167	168	168	167	168	168	168	168	168	168	168	168	168	168	168	166	167	168	168	168	168	168	166	161	163	157	167
log Azotemia (mg/dL)	r	0.37303	0.12183	0.12417	0.13593	0.0092	0.17207	-0.10657	-0.11398	0.03771	0.04846	0.0307	-0.01831	0.1232	-0.00292	0.05661	0.16776	0.08691	-0.02204	0.10403	-0.04439	0.07682	0.07717	-0.26243	0.23193	1	0.31261	-0.10239	0.02691	0.14356	0.02635	0.08914	0.09562
	P	<0.0001	0.1146	0.1088	0.078	0.9057	0.0257	0.1679	0.1401	0.6274	0.5315	0.6919	0.8138	0.1116	0.97	0.4647	0.0292	0.2612	0.776	0.1783	0.5678	0.3238	0.3201	0.0006	0.0025		<0.0001	0.1853	0.7307	0.0684	0.7377	0.2653	0.2176
	n	169	169	168	169	168	168	169	169	168	169	169	168	168	168	169	169	169	169	169	168	167	168	168	168	169	169	169	166	162	164	158	168
Creatinine (mg/dL)	r	0.16088	0.51068	0.04343	0.18194	-0.05241	0.30529	0.00586	0.26975	0.2063	-0.02898	-0.19854	0.01204	-0.10156	0.05187	0.01789	0.23443	0.06109	0.28717	0.07824	0.08141	0.13832	0.1353	-0.14153	0.20965	0.31261	1	-0.03234	0.01001	0.02971	-0.04682	-0.04775	0.10317
	P	0.0367	<0.0001	0.5761	0.0179	0.4999	<0.0001	0.9397	0.0004	0.0073	0.7084	0.0097	0.8769	0.1902	0.5043	0.8175	0.0022	0.4301	0.0002	0.3119	0.2942	0.0746	0.0803	0.0673	0.0064	<0.0001		0.6764	0.8981	0.7074	0.5517	0.5513	0.1833
	n	169	169	168	169	168	168	169	169	168	169	169	168	168	168	169	169	169	169	169	168	167	168	168	168	169	169	169	166	162	164	158	168
log PAI-1 (ng/mL)	r	0.12622	-0.02212	0.06448	0.15426	0.04627	0.18138	0.06553	-0.01745	0.11402	-0.10828	-0.27502	0.06	-0.12482	0.0352	0.2301	0.11472	0.24339	-0.14973	0.06868	0.20112	0.0665	0.13402	0.08455	-0.0079	-0.10239	-0.03234	1	0.30391	0.28363	0.17477	0.20757	0.07611
	P	0.102	0.7753	0.4063	0.0452	0.5514	0.0186	0.3973	0.8218	0.1411	0.1611	0.0003	0.4398	0.1069	0.6506	0.0026	0.1375	0.0014	0.052	0.3749	0.0089	0.3932	0.0833	0.2759	0.9191	0.1853	0.6764		<0.0001	0.0003	0.0252	0.0089	0.3268
	n	169	169	168	169	168	168	169	169	168	169	169	168	168	168	169	169	169	169	169	168	167	168	168	168	169	169	169	166	162	164	158	168
log CRP (mg/L)	r	0.27776	-0.08029	0.38903	0.42485	0.28939	0.31796	0.12296	0.09443	0.34233	0.01785	-0.19259	0.02885	-0.18551	0.04846	0.29437	0.21763	0.32264	-0.01521	0.27658	0.28191	0.08671	0.11387	-0.03168	0.14064	0.02691	0.01001	0.30391	1	0.46605	0.0978	0.25373	0.16806
	P	0.0003	0.3038	<0.0001	<0.0001	0.0002	<0.0001	0.1145	0.2262	<0.0001	0.8194	0.0129	0.7122	0.0167	0.5353	0.0001	0.0049	<0.0001	0.8458	0.0003	0.0002	0.2696	0.1453	0.6854	0.0707	0.7307	0.8981	<0.0001		<0.0001	0.2171	0.0014	0.0309
	n	166	166	165	166	165	165	166	166	165	166	166	166	166	166	166	166	166	166	166	166	164	165	166	166	166	166	166	166	160	161	155	165
log IL6 (pg/mL)	r	0.466	-0.08804	0.30661	0.32207	0.21647	0.24098	0.27196	-0.12208	0.41032	0.08642	-0.20823	0.0285	-0.17886	0.11158	0.13407	0.27697	0.1804	-0.14578	0.32011	0.249	0.14264	0.09708	-0.1029	0.08897	0.14356	0.02971	0.28363	0.46605	1	0.16051	0.38301	0.08634
	P	<0.0001	0.2653	<0.0001	<0.0001	0.0058	0.0021	0.0005	0.1217	<0.0001	0.2742	0.0078	0.7197	0.0232	0.1588	0.089	0.0004	0.0216	0.0642	<0.0001	0.0014	0.072	0.2205	0.194	0.2617	0.0684	0.7074	0.0003	<0.0001		0.0439	<0.0001	0.2746
	n	162	162	161	162	161	161	162	162	161	162	162	161	161	161	162	162	162	162	162	161	160	161	161	161	162	162	162	160	162	158	153	162
log HMGB1 (ng/mL)	r	0.08673	0.17061	0.05479	0.11953	-0.06968	0.23324	0.34442	0.12664	0.13004	-0.24135	-0.33148	-0.17011	-0.13491	-0.07988	0.14207	0.04942	0.14654	0.12284	-0.05567	0.13821	0.0257	0.1955	-0.16223	0.12567	0.02635	-0.04682	0.17477	0.0978	0.16051	1	0.72189	0.21616
	P	0.2695	0.0289	0.4872	0.1274	0.3768	0.0027	<0.0001	0.1061	0.098	0.0019	<0.0001	0.0299	0.086	0.3108	0.0696	0.5297	0.0611	0.1171	0.4789	0.0785	0.7454	0.0124	0.0385	0.1099	0.7377	0.5517	0.0252	0.2171	0.0439		<0.0001	0.0054
	n	164	164	163	164	163	163	164	164	163	164	164	163	163	163	164	164	164	164	164	163	162	163	163	163	164	164	164	161	158	164	158	164
log S100A8/A9 (ng/mL)	r	0.20693	0.12328	0.13241	0.18666	0.03517	0.23475	0.44188	0.05597	0.18867	-0.10585	-0.30452	-0.01686	-0.22191	0.02603	0.10555	0.02475	0.10689	0.06727	0.05209	0.17699	0.07521	0.22088	-0.10899	0.13192	0.08914	-0.04775	0.20757	0.25373	0.38301	0.72189	1	0.11303
	P	0.0091	0.1228	0.0983	0.0189	0.6619	0.0031	<0.0001	0.4849	0.018	0.1856	0.0001	0.834	0.0052	0.7462	0.1869	0.7575	0.1813	0.401	0.5157	0.0266	0.3508	0.0054	0.1742	0.0996	0.2653	0.5513	0.0089	0.0014	<0.0001	<0.0001		0.1574
	n	158	158	157	158	157	157	158	158	157	158	158	157	157	157	158	158	158	158	158	157	156	157	157	157	158	158	158	155	153	158	158	158
log AGEs (μg/mL)	r	0.15994	0.08811	0.14534	0.17678	0.03369	0.22283	0.06229	0.03091	0.00641	0.00271	-0.02802	-0.00742	0.02524	-0.04364	0.04259	0.16835	0.06953	0.07229	0.08249	0.0689	0.15401	0.11644	-0.08544	0.17999	0.09562	0.10317	0.07611	0.16806	0.08634	0.21616	0.11303	1
	P	0.0384	0.2561	0.0609	0.0219	0.6656	0.0038	0.4225	0.6908	0.9344	0.9722	0.7184	0.9242	0.7461	0.5755	0.5836	0.0292	0.3705	0.3518	0.2878	0.3763	0.0476	0.134	0.2723	0.0199	0.2176	0.1833	0.3268	0.0309	0.2746	0.0054	0.1574
	n	168	168	167	168	167	167	168	168	167	168	168	167	167	167	168	168	168	168	168	167	166	167	167	167	168	168	168	165	162	164	158	168
Ipertension (n/%)	r	0.40703	-0.17521	0.13827	0.11561	0.14185	0.01255	-0.01765	0.02183	0.19718	0.05621	-0.10108	0.04622	0.00568	0.09919	0.15398	0.16472	0.186	-0.0765	0.15592	0.08284	0.01169	-0.04099	-0.04319	-0.06722	0.15675	0.09893	0.07712	0.20193	0.26761	-0.0146	-0.0522	-0.0173
	P	<0.0001	0.0227	0.0739	0.1345	0.0666	0.8718	0.8199	0.7782	0.0104	0.4679	0.191	0.5519	0.9418	0.2008	0.0456	0.0323	0.0155	0.3229	0.0429	0.2857	0.8808	0.5978	0.5783	0.3866	0.0418	0.2006	0.319	0.0091	0.0006	0.8528	0.5148	0.8239
	n	169	169	168	169	168	168	169	169	168	169	169	168	168	168	169	169	169	169	169	168	167	168	168	168	169	169	169	166	162	164	158	168
Smoking (n/%)	r	-0.16594	0.11144	-0.00415	-0.03226	-0.04432	0.03554	0.2606	0.03966	0.12675	0.02848	-0.17657	0.03007	-0.18691	0.13013	-0.08309	0.13173	-0.06174	0.1417	0.11061	0.03185	-0.18109	-0.11059	-0.01555	0.03066	-0.19194	-0.03247	0.03719	0.09276	0.04016	0.09138	0.08006	-0.05281
	P	0.0311	0.1492	0.9575	0.6771	0.5683	0.6474	0.0006	0.6087	0.1016	0.7132	0.0217	0.6988	0.0153	0.0927	0.2828	0.0878	0.4252	0.0661	0.1522	0.6819	0.0192	0.1536	0.8414	0.6932	0.0124	0.6752	0.6312	0.2346	0.6118	0.2445	0.3173	0.4966
	n	169	169	168	169	168	168	169	169	168	169	169	168	168	168	169	169	169	169	169	168	167	168	168	168	169	169	169	166	162	164	158	168
